# Supplementary material
Source: PubMed Central journal article supplement (PMC5736808)
Supplement: IAI.00601-17_zii001182257s1.pdf [file IAI.00601-17_zii001182257s1.pdf]

## Supplementary materials

### **Polyphenol- and caffeine-rich post-fermented Pu-er tea improves diet-induced metabolic syndrome by remodeling intestinal homeostasis in mice**

**Running title: Gut microbes link Pu-er tea and metabolic syndrome**

**Xiaoyu Gao<sup>1,4</sup>, Qihong Xie<sup>1,2,3</sup>, Ping Kong<sup>1</sup>, Ling Liu<sup>1</sup>, Sheng Sun<sup>1</sup>, Boyu Xiong<sup>1</sup>, Baojia Huang<sup>1</sup>, Liang Yan<sup>4,6</sup>, Jun Sheng<sup>5</sup> \* and Hongyu Xiang<sup>1,2,3</sup> \***

<sup>1</sup> School of Life Sciences, Jilin University, Changchun Jilin 130012, P.R. China;

<sup>2</sup> National Engineering Laboratory for AIDS Vaccine, School of Life Sciences, Jilin University, Changchun Jilin 130012, P.R. China;

<sup>3</sup> Key Laboratory for Molecular Enzymology and Engineering of Ministry of Education, School of Life Sciences, Jilin University, Jilin 130012, P.R. China;

<sup>4</sup> Pu'er Institute of Pu-er Tea, Pu'er Yunnan 665000, P.R. China;

<sup>5</sup> Key Laboratory of Pu-er Tea Science, Ministry of Education, Yunnan Agricultural University, Kunming Yunnan 650201, P.R. China;

<sup>6</sup> College of Pu-er Tea, West Yunnan University of Applied Science, Pu'er Yunnan 665000, P.R. China

\* Address correspondence to:

Jun Sheng, Professor; E-mail: [Shengj@ynau.edu.cn](mailto:Shengj@ynau.edu.cn)

Hongyu Xiang, Professor; E-mail: [hyxiang@jlu.edu.cn](mailto:hyxiang@jlu.edu.cn)

## Supplementary tables and figures

**Table S1 Important clones in DGGE profiles of mouse feces based on biplot analysis, with percent similarity to known sequences in GenBank**

| Band*  | Length of 16S fragments (bp) | Aligned site in GenBank seq. | Similarity    | Closest relatives in 16S rRNA sequence database                 | GeneBank Accession number |
|--------|------------------------------|------------------------------|---------------|-----------------------------------------------------------------|---------------------------|
| D-10   | 432                          | 918 to 1346                  | 416/429(97%)  | <i>Eubacterium coprostanoligenes</i> strain HL                  | NR_104907.1               |
| D-15   | 433                          | 922 to 1353                  | 432/432(100%) | <i>Romboutsia timonensis</i> strain DR1                         | NR_144740.1               |
| D-19   | 419                          | 939 to 1354                  | 386/419(92%)  | <i>Butyrivibrio crossotus</i> strain DSM 2876                   | NR_104735.1               |
| D-21   | 454                          | 930 to 1383                  | 408/456(89%)  | <i>Lachnoclostridium pacaense</i> strain Marseille-P3100        | NR_147396.1               |
| D-25   | 433                          | 950 to 1382                  | 403/433(93%)  | <i>Eisenbergiella massiliensis</i> strain AT11                  | NR_041625.1               |
| D-27   | 433                          | 859 to 1291                  | 403/433(93%)  | [ <i>Clostridium</i> ] <i>boltea</i> strain JCM 12243           | NR_113410.1               |
| D-28   | 431                          | 777 to 1208                  | 401/435(92%)  | [ <i>Clostridium</i> ] <i>clostridioforme</i> strain ATCC 25537 | NR_118128.1               |
| D-32   | 432                          | 930 to 1361                  | 430/431(99%)  | <i>Akkermansia muciniphila</i> strain ATCC BAA-835              | NR_074436.1               |
| D-49   | 434                          | 932 to 1364                  | 384/440(87%)  | <i>Paenibacillus wexiniae</i> strain 373                        | NR_145946.1               |
| D-51-1 | 433                          | 951 to 1383                  | 384/433(89%)  | [ <i>Bacteroides</i> ] <i>pectinophilus</i> strain N3           | NR_121686.1               |
| D-51-2 | 432                          | 930 to 1361                  | 432/432(100%) | <i>Akkermansia muciniphila</i> strain ATCC BAA-835              | NR_074436.1               |
| D-51-3 | 432                          | 905 to 1330                  | 384/431(89%)  | <i>Muribaculum intestinale</i> strain YL27                      | NR_144616.1               |
| G-13   | 432                          | 918 to 1346                  | 416/429(97%)  | <i>Eubacterium coprostanoligenes</i> strain HL                  | NR_104907.1               |
| G-19   | 431                          | 966 to 1390                  | 369/429(86%)  | <i>Turicimonas muris</i> strain YL45                            | NR_144619.1               |
| G-21   | 437                          | 921 to 1353                  | 433/433(100%) | <i>Romboutsia timonensis</i> strain DR1                         | NR_144740.1               |
| G-26   | 431                          | 965 to 1394                  | 428/430(99%)  | <i>Lactobacillus murinus</i> strain NBRC 14221                  | NR_112689.1               |
| G-29   | 465                          | 964 to 1424                  | 427/466(92%)  | <i>Lactobacillus murinus</i> strain NBRC 14221                  | NR_112689.1               |
| G-33   | 431                          | 942 to 1373                  | 397/433(92%)  | <i>Extibacter muris</i> strain 40cc-B-5824-ARE                  | NR_144610.1               |
| G-38   | 437                          | 950 to 1382                  | 403/433(93%)  | <i>Eisenbergiella massiliensis</i> strain AT11                  | NR_144731.1               |
| G-41   | 418                          | 996 to 1366                  | 341/372(92%)  | [ <i>Ruminococcus</i> ] <i>torques</i> strain VPI B2-51         | NR_036777.1               |
| G-58   | 434                          | 932 to 1364                  | 384/440(87%)  | <i>Paenibacillus wexiniae</i> strain 373                        | NR_145946.1               |
| G-65   | 434                          | 953 to 1383                  | 381/431(88%)  | [ <i>Bacteroides</i> ] <i>pectinophilus</i> strain N3           | NR_121686.1               |
| G-66   | 434                          | 932 to 1361                  | 430/430(100%) | <i>Akkermansia muciniphila</i> strain ATCC BAA-835              | NR_074436.1               |
| G-67   | 432                          | 905 to 1331                  | 393/432(91%)  | <i>Muribaculum intestinale</i> strain YL27                      | NR_144616.1               |

\* All the bands were named according to the Figure 6A (band: D-) and 6D (band: G-).

**Table S2 Chemical characterization of post-fermented Pu-er tea (PE)**

| Category                                                     | Chemical components   | Content (%)  | Determination method                                   |
|--------------------------------------------------------------|-----------------------|--------------|--------------------------------------------------------|
| Polyphenols and their derivatives (Oxidized Tea Polyphenols) | Tea polyphenols*      | 22.80 ± 0.00 | Ferric tartrate colorimetric method                    |
|                                                              | Catechins             | 1.01 ± 0.01  | HPLC-UV                                                |
|                                                              | Flavonoids            | 1.72 ± 0.05  | HPLC-UV                                                |
|                                                              | Gallic acid           | 1.35 ± 0.00  | HPLC-UV                                                |
|                                                              | Theabrownin           | 36.19 ± 0.01 | Extraction-Spectrophotometry                           |
|                                                              | Theaflavin            | 5.20 ± 0.02  | Extraction-Spectrophotometry                           |
| Polysaccharides                                              | Thearubigins          | 13.65 ± 0.01 | Extraction-Spectrophotometry                           |
|                                                              | Polysaccharides       | 14.16 ± 0.01 | Anthrone-Sulfuric acid Colorimetric Method             |
| Caffeine                                                     | Combined-Caffeine     | 2.59 ± 0.05  | Low-pH precipitation method and HPLC-UV                |
|                                                              | Free-Caffeine         | 7.37 ± 0.15  | HPLC-UV                                                |
| Protein and Amino acid                                       | Protein               | 19.37 ± 0.02 | Comassie brilliant blue colorimetric method            |
|                                                              | Amino acid            | 4.83 ± 0.01  | Automatic amino acid analyzer-External standard method |
| Others                                                       | Microelements (total) | 63.39 mg/g   | ICP-AES(GB/T 18932.11-2002)                            |

\* For the complicated interaction between different components, it is difficult to purify the single substance from PE. Most of tea polyphenols (TP) in PE were oxidized, polymerized and condensed into theabrownin; Therefore, Ferric tartrate colorimetric method is not suit for the precise determination of TP in PE.

**Table S3 Chemical characterization of PE and TP**

| Catechins in PE |             | Microelements in PE |                             | Chemical characterization of TP |             |
|-----------------|-------------|---------------------|-----------------------------|---------------------------------|-------------|
| Catechins       | Content (%) | Elements            | Content ( $\mu\text{g/g}$ ) | Category                        | Content     |
| EGC             | 0.34        | K                   | 50200                       | Purity (%)                      | $\geq 98.0$ |
| C               | 0.16        | P                   | 9540                        | Catechin (%)                    | $\geq 90.0$ |
| EGCG            | 0.90        | Mg                  | 2630                        | EGCG (%)                        | $\geq 60.0$ |
| EC              | 0.36        | Mn                  | 726                         | Caffeine                        | $< 0.5$     |
| ECG             | 0.60        | Ca                  | 263                         | Water content (%)               | $< 5.0$     |
|                 |             | Fe                  | 37.01                       | Ash content (%)                 | $< 0.2$     |
|                 |             | Cu                  | ND                          | Heavy metal (ppm)               | $< 10.0$    |
|                 |             | Zn                  | ND                          | Pesticide residue (ppm)         | $< 0.1$     |
|                 |             | Na                  | ND                          |                                 |             |

EGC, (-)-epigallocatechin; C, (+)-catechin; EGCG, (-)-epigallocatechin-3-gallate; EC, (-)-epicatechin; ECG (-)-epicatechin-3-gallate.

**Table S4 Primers sequences used for quantitative PCR analysis of gene expression**

| <b>Primer</b>                  | <b>Forward sequence</b>     | <b>Reverse sequence</b>   |
|--------------------------------|-----------------------------|---------------------------|
| <i>RPL-19</i>                  | GAAGGTCAAAGGGAATGTGTTCA     | CCTTGTCTGCCTTCAGCTTGT     |
| <i>GAPDH</i>                   | GTGTTCTACCCCAATGTGT         | ATTGTCATACCAGGAAATGAGCTT  |
| <i>B2M</i>                     | TTGTCTCACTGACCGGCCT         | TATGTTCTGGCTTCCCATTCTCC   |
| <i>TNF-<math>\alpha</math></i> | AGACCCTCACACTCAGATCA        | TCTTTGAGATCCATGCCGTTG     |
| <i>IL-1<math>\beta</math></i>  | TCCATGAGCTTTGTACAAGGA       | AGCCATACTTTAGGAAGACA      |
| <i>IL-6</i>                    | GTTCTCTGGGAAATCGTGGA        | TGTACTCCAGGTAGCTA         |
| <i>MCP-1</i>                   | TTAAAAACCTGGATCGGAACCAA     | GCATTAGCTTCAGATTTACGGGT   |
| <i>LPL</i>                     | CATCGAGAGGATCCGAGTGAA       | TGCTGAGTCCTTTCCCTTCTG     |
| <i>Fiaf</i>                    | CAATGCCAAATTGCTCCAATT       | TGGCCGTGGGCTCAGT          |
| <i>LOX-1</i>                   | ACAAGATGAAGCCTGCGAAT        | GCTGAGTAAGGTTTCGCTTGG     |
| <i>G6pc</i>                    | AGGAAGGATGGAGGAAGGAA        | TGGAACCAGATGGGAAAGAG      |
| <i>Glut4</i>                   | ACGACGGACACTCCATCTGTTG      | GGAGACATAGCTCATGGCTGGAA   |
| <i>Cebpa</i>                   | GAGCCGAGATAAAGCCAAACA       | GCGCAGGCGGTCATTG          |
| <i>Fasn</i>                    | TTCCAAGACGAAAATGATGC        | AATTGTGGGATCAGGAGAGC      |
| <i>Acc1</i>                    | TGTTGAGACGCTGGTTTGTAGAA     | GGTCCTTATTATTGTCCCAGACGTA |
| <i>Cpt1a</i>                   | AGACCGTGAGGAACTCAAACCTAT    | TGAAGAGTCGCTCCCACT        |
| <i>Acox1</i>                   | CTATGGGATCAGCCAGAAAGG       | AGTCAAAGGCATCCACCAAAG     |
| <i>Pgc1a</i>                   | AGCCGTGACCACTGACAACGAG      | GCTGCATGGTTCTGAGTGCTAAG   |
| <i>Ppara</i>                   | CAACGGCGTCGAAGACAAA         | TGACGGTCTCCACGGACAT       |
| <i>Ppar<math>\gamma</math></i> | TCGCTGATGCACTGCCTATG        | GAGAGGTCCACAGAGCTGATT     |
| <i>Ucp1</i>                    | ACTGCCACACCTCCAGTCATT       | CTTTGCCTCACTCAGGATTGG     |
| <i>Cidea</i>                   | TGCTCTTCTGTATCGCCCAGT       | GCCGTGTTAAGGAATCTGCTG     |
| <i>CD137</i>                   | CGTGCAGAACTCCTGTGATAAC      | GTCCACCTATGCTGGAGAAGG     |
| <i>Tmem26</i>                  | ACCCTGTCATCCCACAGAG         | TGTTTGGTGGAGTCCTAAGGTC    |
| <i>Tbx1</i>                    | GGCAGGCAGACGAATGTTC         | TTGTCATCTACGGGCACAAAG     |
| <i>Prdm16</i>                  | CAGCACGGTGAAGCCATTC         | GCGTGCATCCGCTTGTG         |
| <i>Occludin</i>                | ATGTCCGGCCGATGCTCTC         | TTTGGCTGCTCTTGGGTCTGTAT   |
| <i>ZO-1</i>                    | TTTTTGACAGGGGGAGTGG         | TGCTGCAGAGGTCAAAGTTCAAG   |
| <i>Muc2</i>                    | ACGTGTCATATTTGCACCTCT       | TCAACATTGAGAGTGCCAACT     |
| <i>Reg3g</i>                   | TTCTGTCTCCATGATCAAA         | CATCCACCTCTGTTGGGTTC      |
| <i>Lyz1</i>                    | GCCAAGGTCTACAATCGTTGTGAGTTG | CAGTCAGCCAGCTTGACACCACG   |
| <i>Pla2g2</i>                  | AGGATTCCCCAAGGATGCCAC       | CAGCCGTTTCTGACAGGAGTTCTGG |
| <i>Defa</i>                    | GGTGATCATCAGACCCCAGCATCAGT  | AAGAGACTAAAAGTGGAGGAGCAGC |

## Supplementary Figure S1:

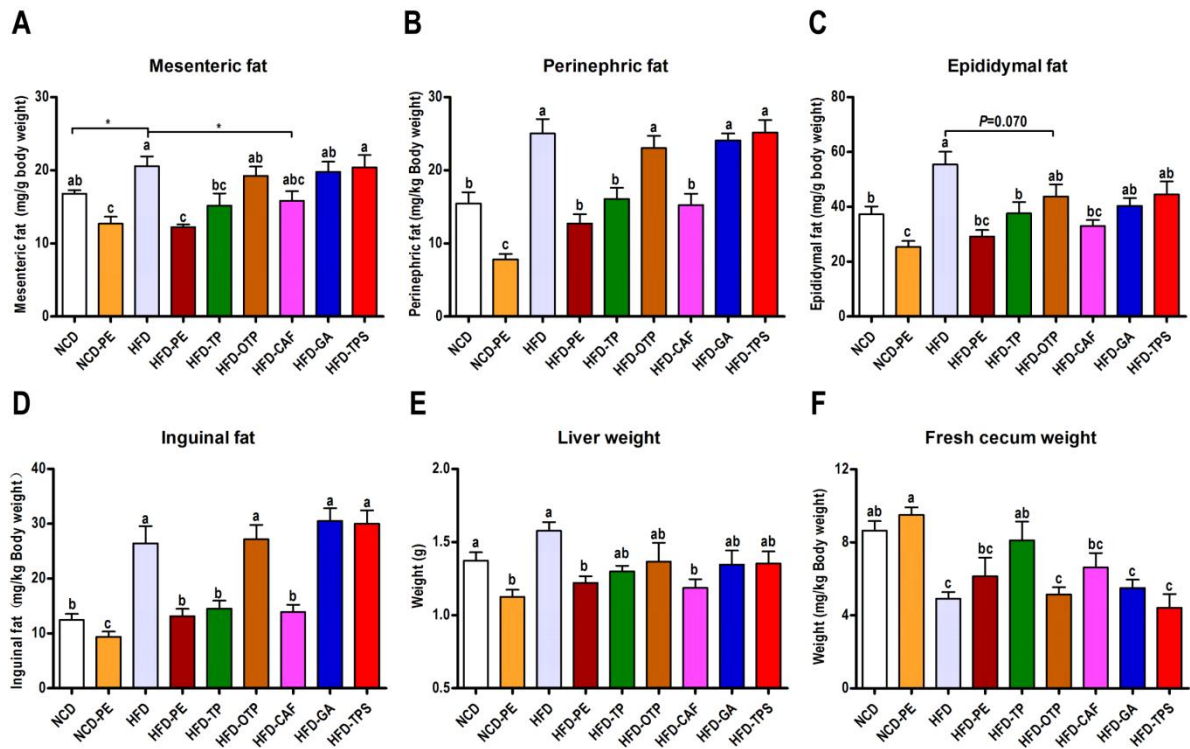

**Figure S1 Effects of PEAC administration on the body composition of mice**

Mice were fed either a NCD or a HFD for 12 weeks. Two groups of NCD-fed and HFD-fed mice were treated daily with oral doses of PE (750 mg/kg). The other five groups of HFD-fed mice were treated daily with oral doses of TP (250 mg/kg), OTP (250 mg/kg), TPS (250 mg/kg), CAF (50 mg/kg) and GA (50 mg/kg). The NCD- and HFD-fed control mice received a gavage with vehicle (water). Relative weight of mesenteric fat (A), perinephric fat (B), epididymal fat (C) and inguinal fat (D); (E) liver weight; (F) relative weight of fresh cecum. The data are expressed as the means  $\pm$  SEM,  $n = 8-10$ . Data with different superscript letters are significantly different ( $P < 0.05$ ) according to the post hoc one-way ANOVA statistical analysis.

## Supplementary Figure S2:

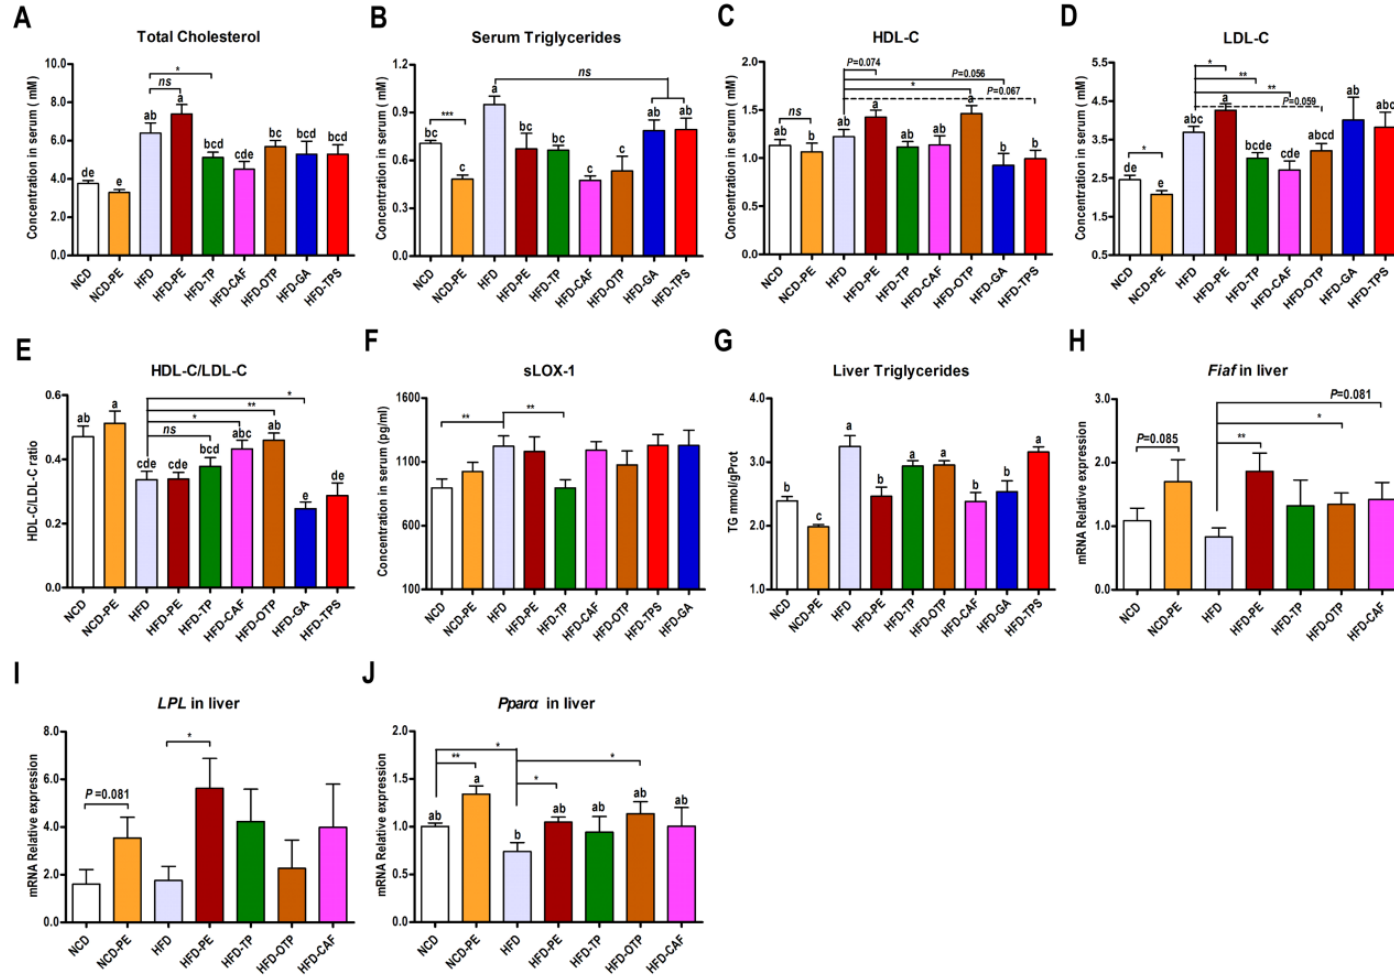

## Figure S2 Effect of PEAC administration on lipid metabolism in the blood and liver

A-J: Effect of PEAC administration on lipid metabolism in the blood and liver. PE, TP, OTP and CAF improved the HFD-induced hyperlipidemia and liver adipose deposition to different extents. The blood lipid profile, including total cholesterol (A), TG (B), HDL-C (C), and LDL-C (D); (E) the ratio of HDL-C to LDL-C; (F) soluble (LOX-1) content, which is a receptor for ox-LDL; (G) TG content in the liver; mRNA expression of (H) *Fiaf*, (I) *LPL* and (J) *Ppara* in the liver.

The data are expressed as the means  $\pm$  SEM, n = 8-10 (A-G); n = 6-8 (H-J). Data with different superscript letters are significantly different ( $P < 0.05$ ) according to the post hoc one-way ANOVA statistical analysis. \* indicates a significant difference between two groups using the unpaired two-tailed Student t-test (\*  $P < 0.05$ , \*\*  $P < 0.01$ ).



Supplementary Figure S3:

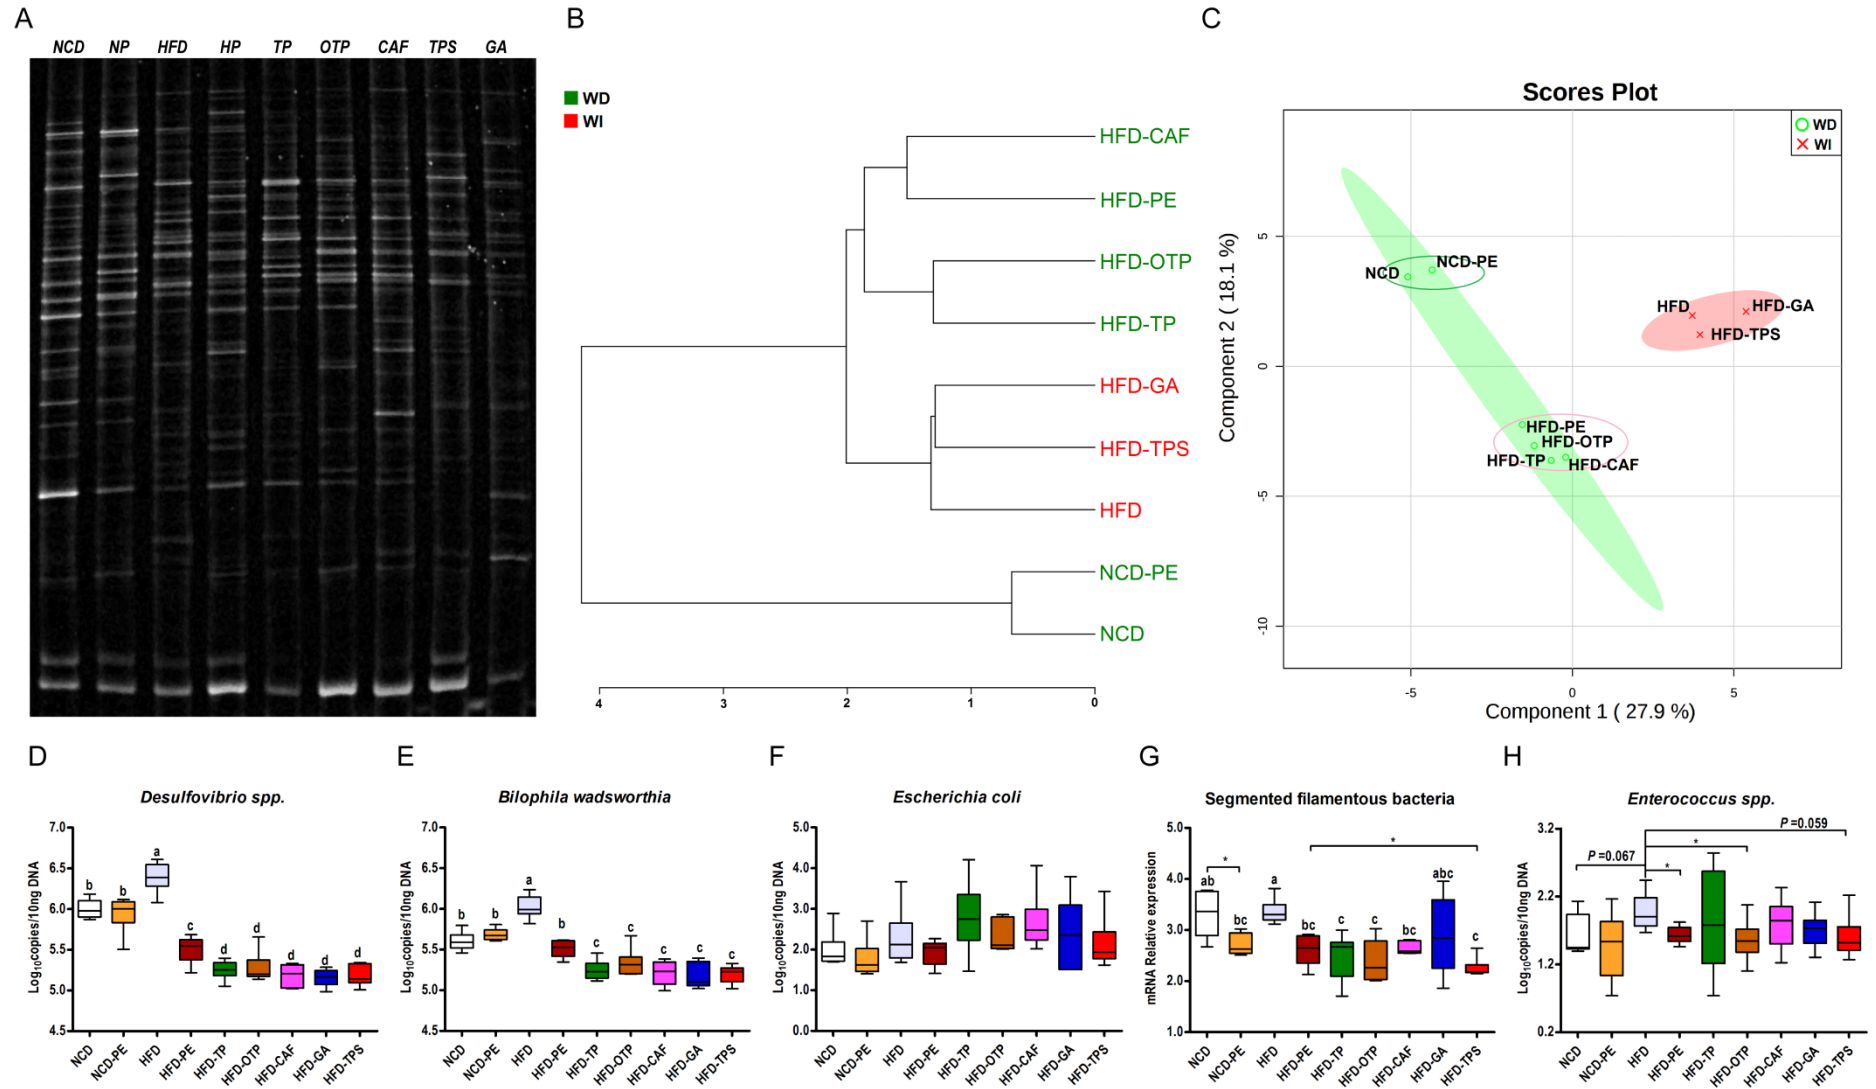

**Figure S3 Effect of PEAC on the HFD-induced gut microbial community structure shift and selected specific gut bacteria**

A-C: PEAC administration repaired the HFD-induced gut microbial community structural shift. Drastic changes in the microbial community structure in the cecal content of mice induced by PEAC administration and assessed by PCR-DGGE. (A) Microbial profiles of the cecal DNA content in different PEAC-treated mice with a denaturant gradient ranging from 42.5%-57.5%; (B) hierarchical clustering analysis (Pearson distance, Ward's clustering algorithm); (C) PLS-DA of different PEAC treatments; WI, weight increased groups compared to the HFD group; WD, weight decreased groups compared to the HFD group.

D-H: qPCR analyses of selected specific gut bacteria in mice cecal content. The data are expressed as Whisker plots from minimum to maximum,  $n = 6$ . Data with different superscript letters are significantly different ( $P < 0.05$ ) according to the post hoc one-way ANOVA statistical analysis. \*indicates a significant difference between two groups using the unpaired two-tailed Student t-test (\*,  $P < 0.05$ ; \*\*,  $P < 0.01$ ; \*\*\*,  $P < 0.001$ ).

Supplementary Figure S4:

A

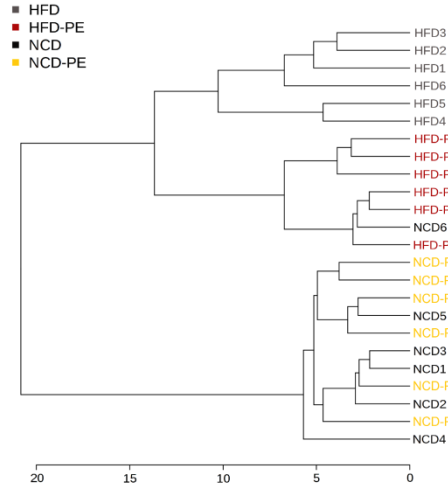

B

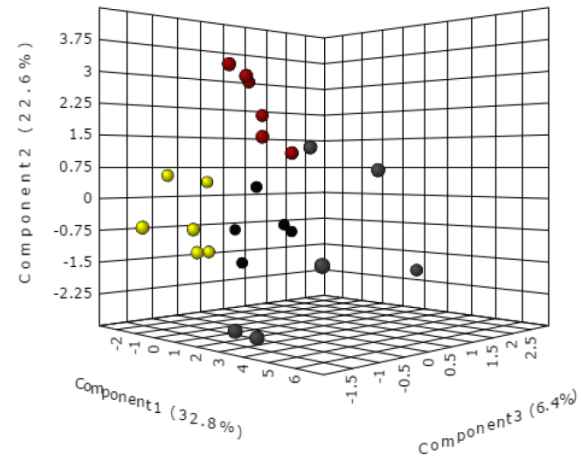

C

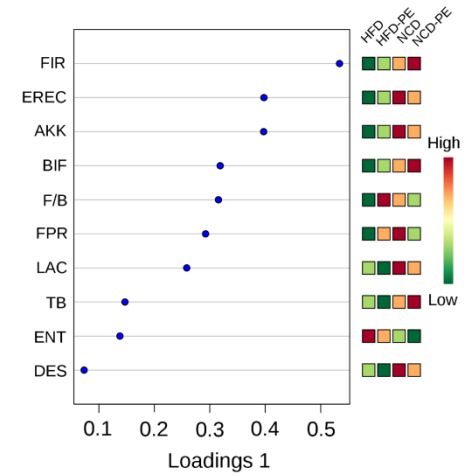

D

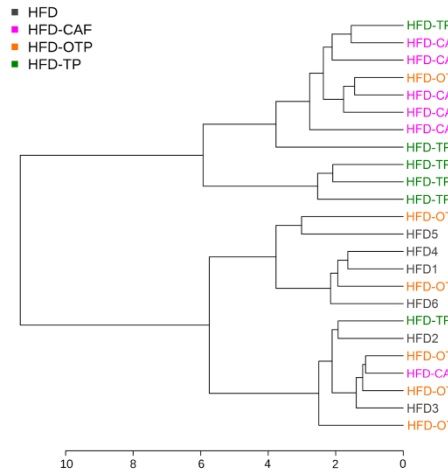

E

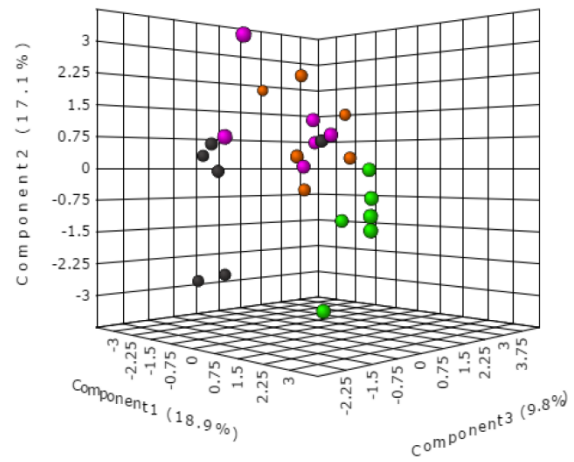

F

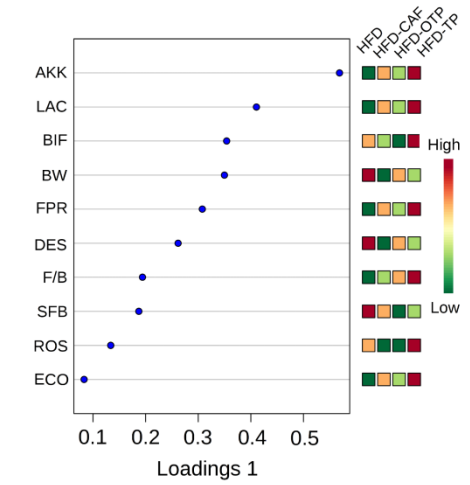

**Figure S4 Multivariate statistical analysis using the qPCR results of selected gut bacteria in mouse ceca contents.**

Hierarchical clustering analysis (Pearson distance, Ward's clustering algorithm) were performed with the results of NCD, NCD-PE, HFD and HFD-PE groups (A), or HFD, HFD-TP, HFD-OTP and HFD-CAF groups (D); sPLS-DA was performed to discriminate the key factors in the NCD, NCD-PE, HFD and HFD-PE group (B and C) or HFD, HFD-TP, HFD-OTP and HFD-CAF group (D and E).

## Supplementary Figure S5:

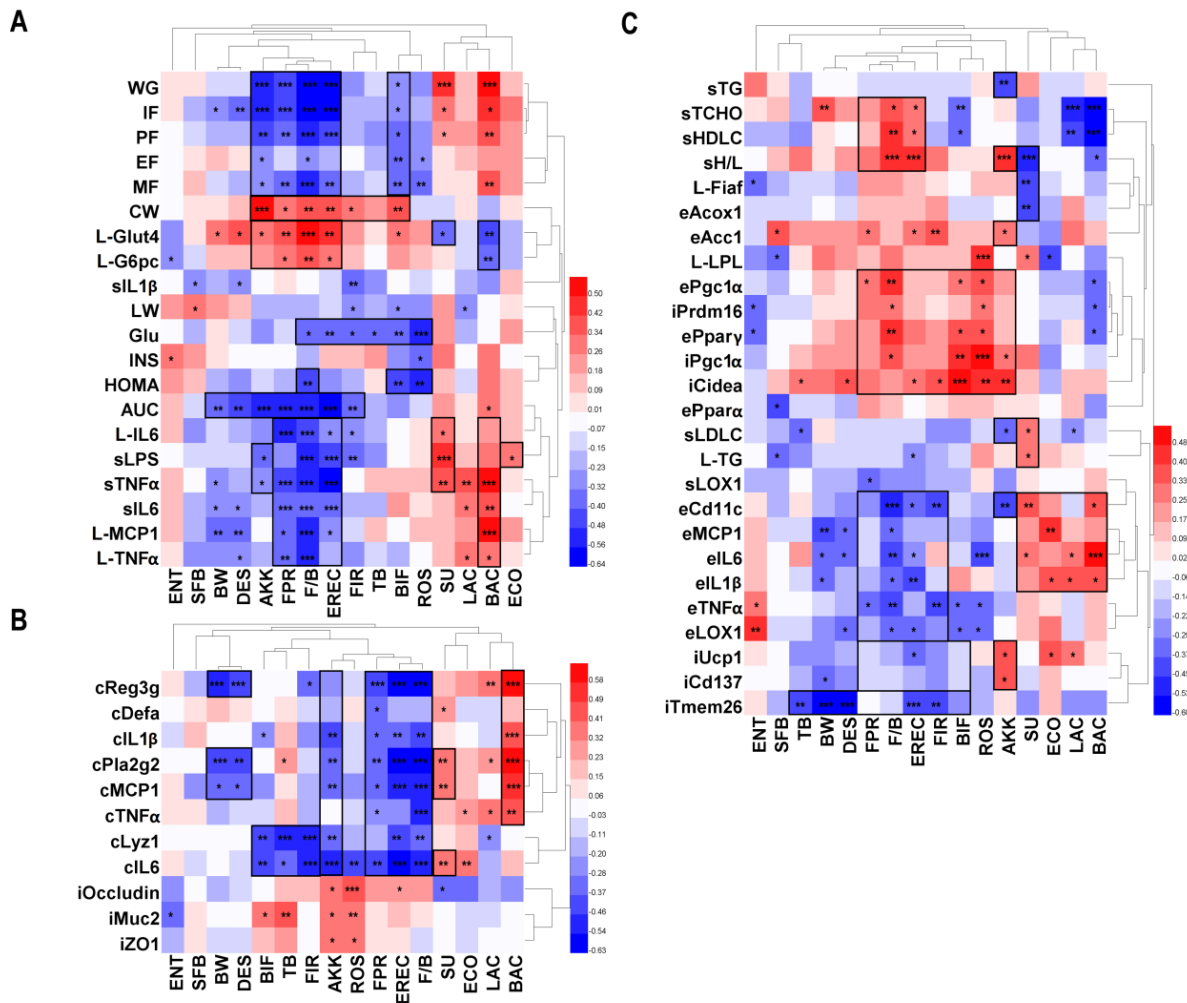

**Figure S5 Biplot analysis and heat map correlation showing the associations among the bacterial taxa and host parameters.**

Heat maps were generated to exhibit the Pearson correlations among all selected bacterial taxa in the qPCR analysis and all significantly affected host parameters by PEAC in the animal test. (A) Associations among bacterial taxa and host parameters, including body composition, metabolic endotoxemia, systemic and hepatic inflammation and glucose metabolism; (B) associations among bacterial taxa and intestinal homeostasis-related parameters; (C) associations among bacterial taxa and all lipid metabolism-related parameters and inflammatory factors in adipose tissue. *P*-values were adjusted for multiple testing

according to the Bonferroni and Hochberg procedures. The color at each intersection indicates the value of the  $r$  coefficient; \* indicates a significance correlation between these two parameters (\* $P$ <0.05, \*\* $P$ <0.01, \*\*\* $P$ <0.001).

TB, total bacteria; FIR, *Firmicutes*; BAC, *Bacteroidetes*; F/B, *Firmicutes/Bacteroidetes*; AKK, *Akkermansia muciniphila*; EREC, *Eubacterium rectale/Clostridium coccooides* group; FPR, *Faecalibacterium prausnitzii*; ROS, *Roseburia* spp.; BIF, *Bifidobacterium* spp.; *Lactobacillus* spp. (LAC); SFB, Segmented filamentous bacteria; SU, *Sutterella* spp.; BW, *Bilophia wadsworthia*; DES, *Desulfovibrio* spp.; ENT, *Enterococcus* spp.; ECO, *Escherichia coli*.

On the left side of Figure 7A: WG, body weight gain; IF, weight of inguinal fat; PF, weight of perinephric fat; EF, weight of epididymal fat; MF, weight of mesenteric fat; CW, cecum weight; LW, liver weight. L-TNF $\alpha$  indicates *TNF $\alpha$*  expressed in the liver; sLPS indicates LPS expressed in the serum and other indexes.

On the left side of Figure 7B: cTNF $\alpha$  indicates *TNF- $\alpha$*  expressed in the colon; iZO1 indicates *ZO-1* expressed in the ileum and other indexes.

On the left side of Figure 7C: sH/L indicates the HDL-C/LDL-C value in the serum; sTG indicates the TG content in the serum; L-TG indicates the TG content in the liver; eTNF $\alpha$  indicates *TNF- $\alpha$*  expressed in the epididymal fat pad; iUcp1 indicates *Ucp1* expressed in the inguinal fat pad and other indexes.

## Supplementary Figure S6:

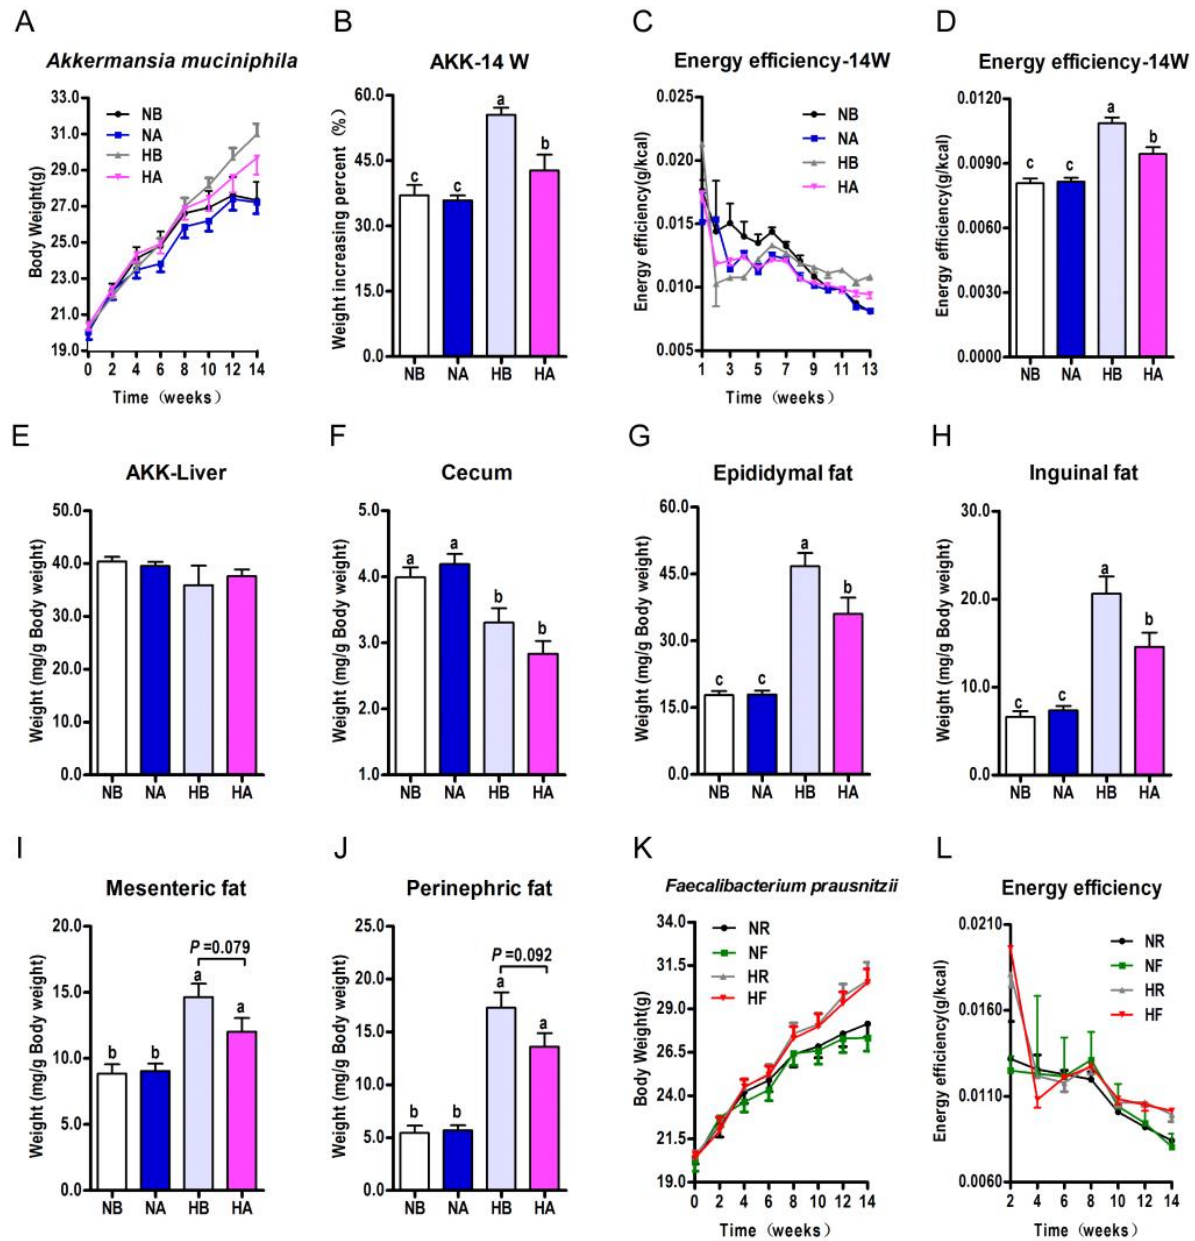

**Figure S6 Effects of AKK and FPR administrations on body composition and energy efficiency of mice.**

Six-week-old mice were fed either a NCD or a HFD for 14 weeks. Two groups of NCD-fed and HFD-fed mice were treated daily with oral doses of 300  $\mu$ l AKK culture medium ( $1 \times 10^9$  cfu/ml liquid; NA, HA) or 300  $\mu$ l FPR culture medium ( $2 \times 10^9$  cfu/ml liquid; NF, HF). NCD- and HFD-fed control mice received a gavage with the corresponding sterile culture medium (AKK: NB, HB; FPR: NR, HR).

(A, K) Weight gain curves; (B) total weight gain; (C, D, L) energy efficiency (ie, ratio between body weight gain and energy intake); Relative weight of liver (E), cecum (F), epididymal fat (G), and inguinal fat (H); mesenteric fat (I), perinephric fat (J). The data are expressed as the means  $\pm$  SEM, n = 8-10. Data with different superscript letters are significantly different ( $P < 0.05$ ) according to post hoc ANOVA one way statistical analysis.  $P$  values in figures indicate the difference between two groups using the unpaired two-tailed Student t-test.



## Supplementary Figure S7:

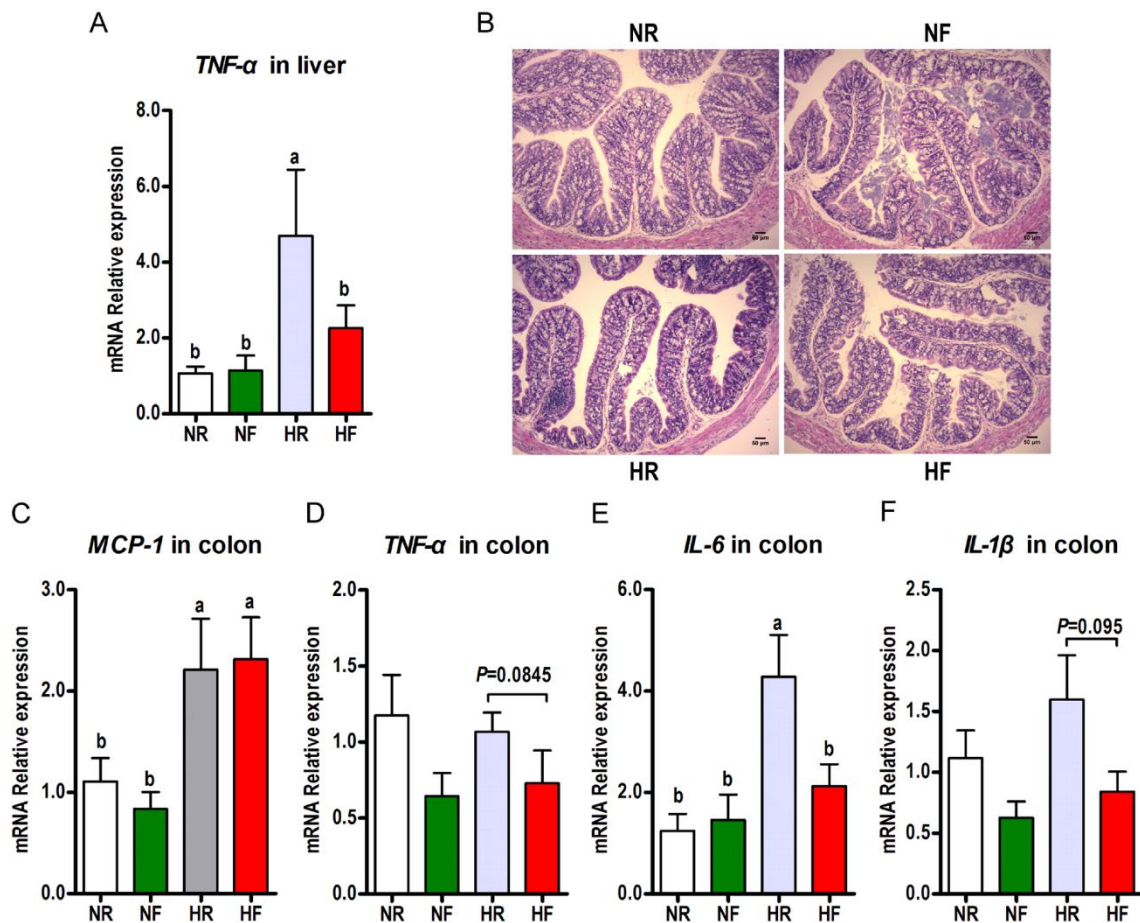

**Figure S7 FPR administrations reduced the mRNA expression of makers of inflammation in liver and colon.**

Six-week-old mice were fed either a NCD or a HFD for 14 weeks. Two groups of NCD-fed and HFD-fed mice were treated daily with oral doses of 300  $\mu$ l FPR culture medium ( $2 \times 10^9$  cfu/ml liquid; NF, HF). NCD- and HFD-fed control mice received a gavage with the corresponding sterile culture medium (NR, HR).

(A) mRNA expression of *TNF- $\alpha$*  in liver; (B) Photomicrographs of H&E-stained proximal colon sections. Infiltration of inflammatory cells into tissue gives bluer photomicrographs in the HR group; Expression of inflammation gene in proximal colon, including (C) *MCP-1*, (D) *TNF- $\alpha$* , (E) *IL-6* and (F) *IL-1 $\beta$* . The data are expressed as the means  $\pm$  SEM  $n = 6$ . Data with different superscript letters are significantly different ( $P < 0.05$ ) according to post hoc ANOVA one way statistical analysis. *P* values in figures indicate the difference between two groups using the unpaired two-tailed Student t-test.

Supplementary Figure S8:

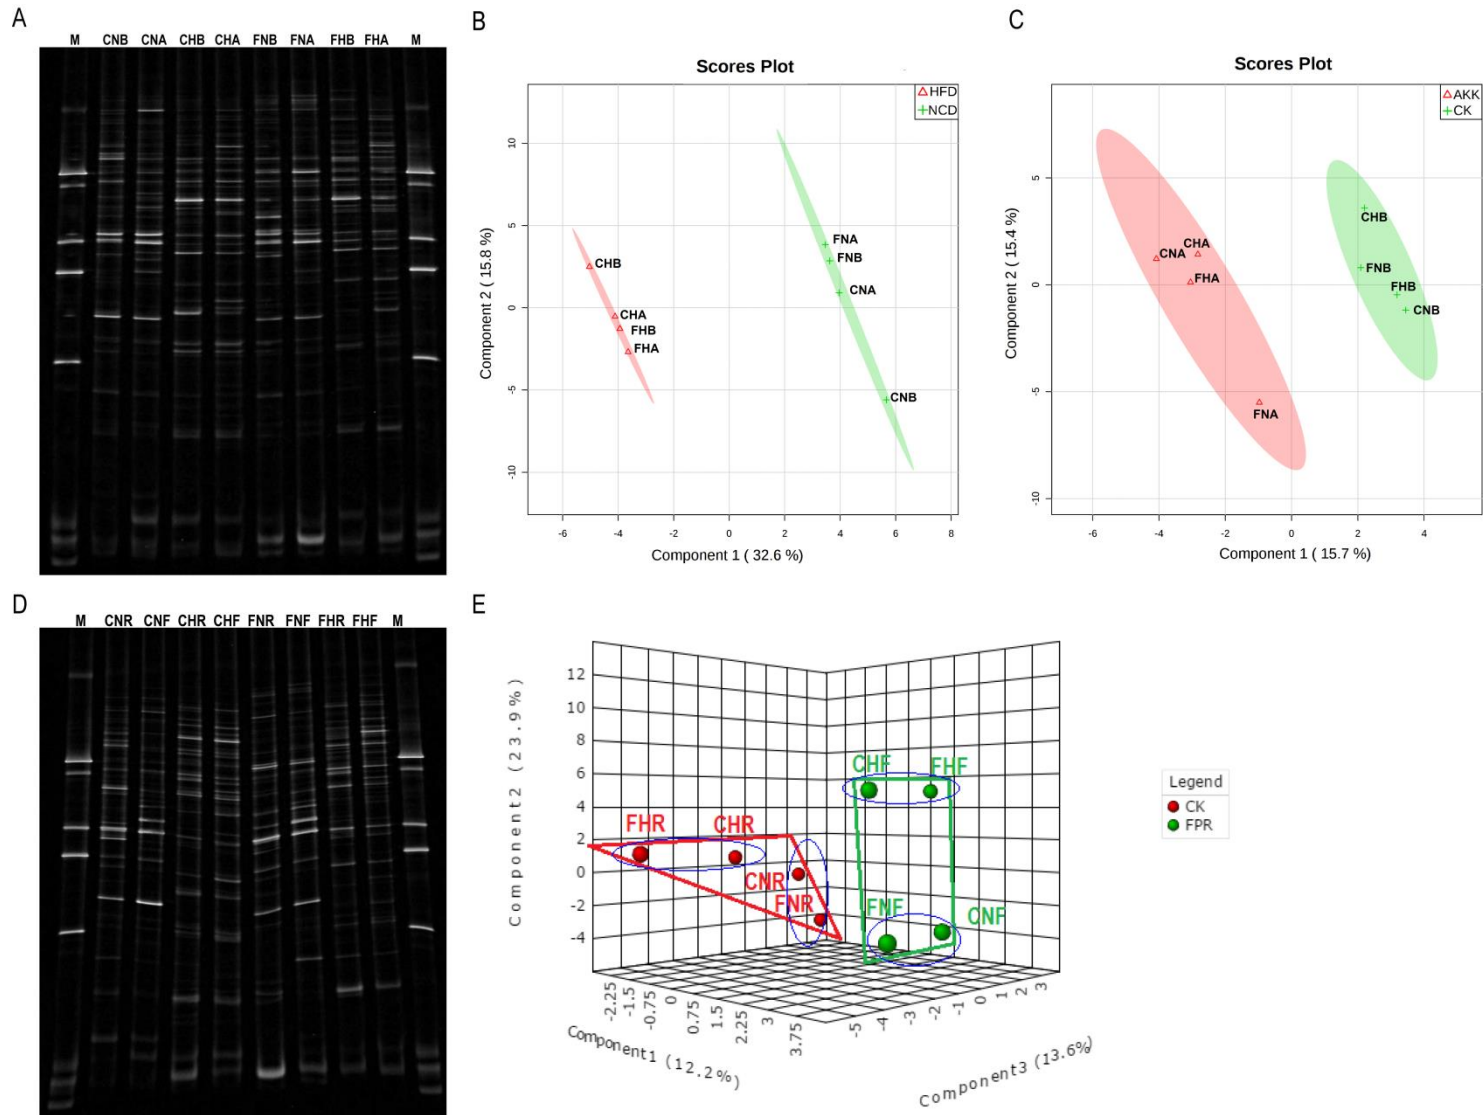

**Figure S8 AKK and FPR administrations altered the gut microbial community structure**

Six-week-old mice were fed either a NCD or a HFD for 14 weeks. Two groups of NCD-fed and HFD-fed mice were treated daily with oral doses of 300  $\mu$ l AKK culture medium ( $1 \times 10^9$  cfu/ml liquid; NA, HA) or 300  $\mu$ l FPR culture medium ( $2 \times 10^9$  cfu/ml liquid; NF, HF). NCD- and HFD-fed control mice received a gavage with the corresponding sterile culture medium (AKK: NB, HB; FPR: NR, HR).

Changes in microbial community structure in cecal content and feces of mice induced by AKK and FPR administration and assessed by PCR-DGGE. Microbial profiles of cecal content and feces DNA of AKK (A) and FPR (D) treated mice with a denaturant gradient ranging from 42.5%-57.5%; CNB, CNA, CHB and CHA in figure A indicate cecal content of NB, NA, HB and HA group; CNR, CNF, CHR and CHF in figure D indicate cecal content of NR, NF, HR and HF group. FNB, FNA, FHB and FHA in figure A indicate feces of NB, NA, HB and HA group; FNR, FNF, FHR and FHF in figure D indicate feces content of NR, NF, HR and HF group. (B) Partial least squares-discriminant analysis (PLS-DA) from the aspect of diet types (NCD vs HFD); (C) PLS-DA from the aspect of AKK administration or not (CK vs AKK); (E) PLS-DA from the aspect of FPR administration or not (CK vs FPR).

**Supplementary Figure S9:**

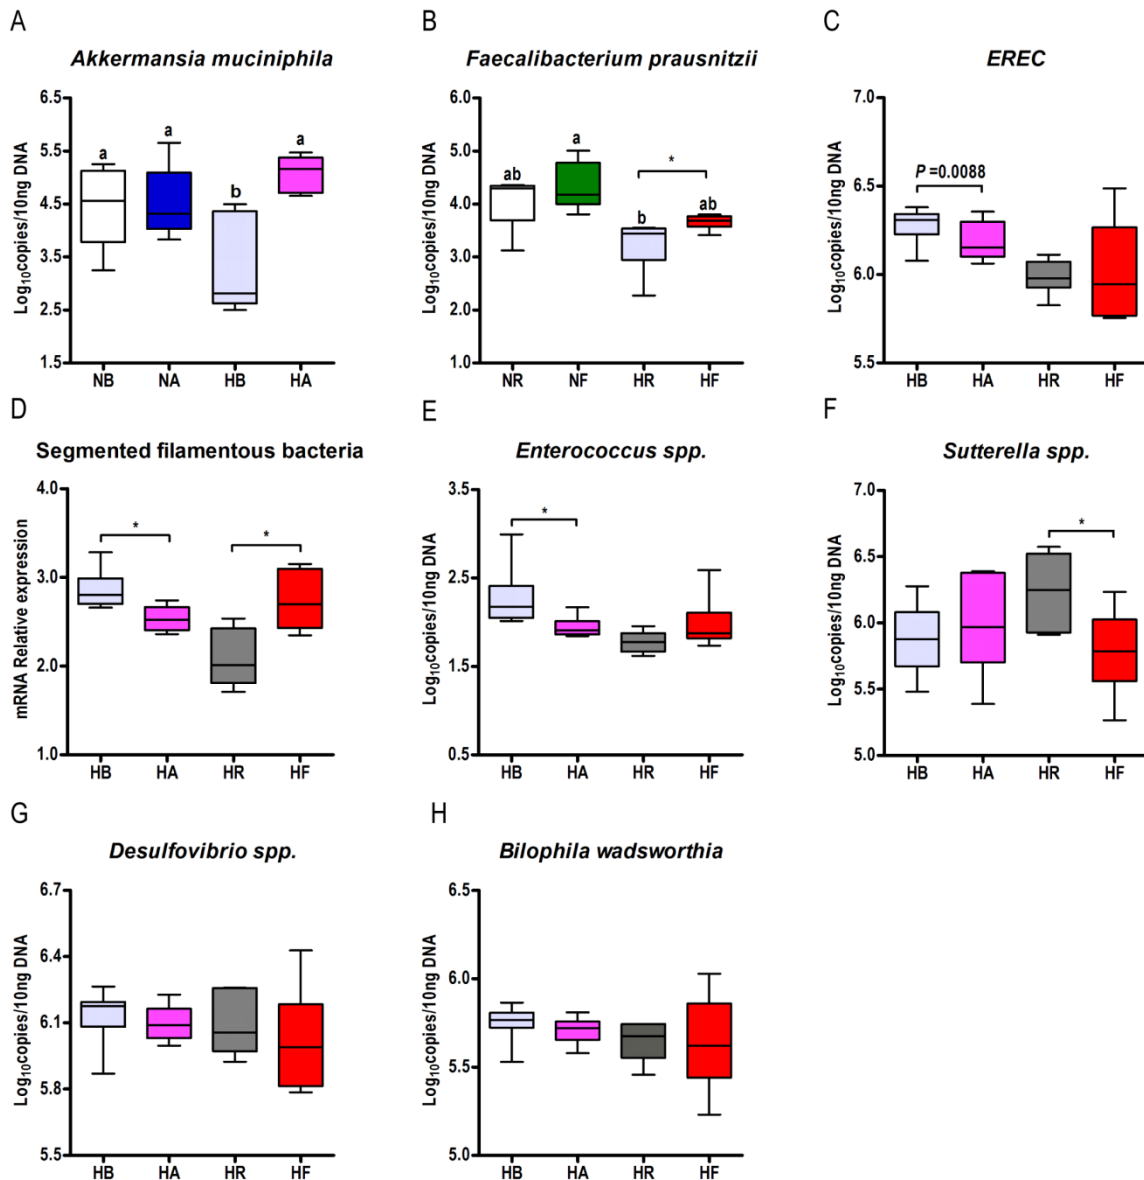

**Figure S9 Effects of AKK and FPR administrations on selected specific gut bacteria in mouse cecal content**

Six-week-old mice were fed either a NCD or a HFD for 14 weeks. Two groups of NCD-fed and HFD-fed mice were treated daily with oral doses of 300  $\mu$ l AKK culture medium ( $1 \times 10^9$  cfu/ml liquid; NA, HA) or 300  $\mu$ l FPR culture medium ( $2 \times 10^9$  cfu/ml liquid; NF, HF). NCD- and HFD-fed control mice received a gavage with the corresponding sterile culture medium (AKK: NB, HB; FPR: NR, HR).

(C) *Eubacterium rectale*/*Clostridium coccoides* group (EREC). The data are expressed as Whiskers plots with minimum to maximum, n = 6-8. Data with different superscript letters are significantly different ( $P < 0.05$ ) according to post hoc ANOVA one way statistical analysis. \*indicates a significant difference between two groups using the unpaired two-tailed Student t-test ( $P < 0.05$ ).
